# Supplementary material
Source: PubMed Central journal article supplement (PMC2141920)
Supplement: pnas_0703159104_1.pdf [file pnas_0703159104_1.pdf]

**Table 2. Small intestine (SI) length and nominal surface area (NSA) of omnivorous birds and eutherian mammals [common names were extracted from the Integrated Taxonomic Information System (ITIS; [www.itis.gov](http://www.itis.gov)) and ref. 1]**

| Species              |                                   | Order           | Family         | Body mass, g | SI length, cm | SI NSA, cm <sup>2</sup> | Source     |
|----------------------|-----------------------------------|-----------------|----------------|--------------|---------------|-------------------------|------------|
| Common name          | Scientific name                   |                 |                |              |               |                         |            |
| <b>BIRDS</b>         |                                   |                 |                |              |               |                         |            |
| Mottled duck         | <i>Anas fulvigula</i>             | Anseriformes    | Anatidae       | 742          | 135.85        |                         | 2, 3       |
| Mallard              | <i>Anas platyrhynchos</i>         | Anseriformes    | Anatidae       | 1,237.2      | 122.9         | 160                     | 3-6        |
| Lesser scaup         | <i>Aythya affinis</i>             | Anseriformes    | Anatidae       | 718          | 172.1         |                         | 6, 7       |
| Greater scaup        | <i>Aythya marila</i>              | Anseriformes    | Anatidae       | 892          | 169.6         |                         | 6, 7       |
| Muscovy duck         | <i>Cairina moschata</i>           | Anseriformes    | Anatidae       | 585          | 127.8         |                         | 3          |
| Herring gull         | <i>Larus argentatus</i>           | Charadriiformes | Laridae        | 787.9        | 90            |                         | 3          |
| Ring-billed gull     | <i>Larus delawarensis</i>         | Charadriiformes | Laridae        | 359.7        | 69            |                         | 3          |
| Glaucous gull        | <i>Larus hyperboreus</i>          | Charadriiformes | Laridae        | 1,132        | 116.5         |                         | 3          |
| Pigeon               | <i>Columba livia</i>              | Columbiformes   | Columbidae     | 270.4        | 60.3          | 68.6                    | 3, 4, 8, 9 |
| Northern bobwhite    | <i>Colinus virginianus</i>        | Galliformes     | Odontophoridae | 166.7        | 50.3          | 63.84                   | 3, 10, 11  |
| Montezuma quail      | <i>Cyrtonyx montezumae</i>        | Galliformes     | Odontophoridae | 186          | 46            |                         | 11         |
| Rock partridge       | <i>Alectoris graeca</i>           | Galliformes     | Phasianidae    | 576          | 77.5          |                         | 11         |
| Scaled quail         | <i>Callipepla squamata</i>        | Galliformes     | Phasianidae    | 175          | 59            |                         | 11         |
| Japanese quail       | <i>Coturnix coturnix japonica</i> | Galliformes     | Phasianidae    | 169.1        | 37.4          | 29.85                   | 12, 13     |
| Chicken              | <i>Gallus g. domesticus</i>       | Galliformes     | Phasianidae    | 2,481        | 188.4         | 550                     | 3, 9       |
| Gambel's quail       | <i>Lophortyx gambelii</i>         | Galliformes     | Phasianidae    | 188          | 81            |                         | 11         |
| Wild turkey          | <i>Meleagris gallopavo</i>        | Galliformes     | Phasianidae    | 7,050        | 222           |                         | 3, 11      |
| Mountain quail       | <i>Oreortyx picta</i>             | Galliformes     | Phasianidae    | 250          | 76.5          |                         | 11         |
| Hungarian partridge  | <i>Perdix perdix</i>              | Galliformes     | Phasianidae    | 395          | 59            |                         | 11         |
| Ring-necked pheasant | <i>Phasianus colchicus</i>        | Galliformes     | Phasianidae    | 938.3        | 97.8          | 130                     | 3-5, 11    |
| American coot        | <i>Fulica americana</i>           | Gruiformes      | Rallidae       | 491          | 73.8          | 75.5                    | 3, 4       |
| Purple gallinule     | <i>Porphyrula martinica</i>       | Gruiformes      | Rallidae       | 163.9        | 42.9          |                         | 3          |
| Waxwing              | <i>Bombycilla garrulus</i>        | Passeriformes   | Bombycillidae  | 62.1         | 29.19         |                         | 14         |
| Raven                | <i>Corvus corax</i>               | Passeriformes   | Corvidae       | 874          | 103.5         |                         | 3          |
| Rook                 | <i>Corvus frugilegus</i>          | Passeriformes   | Corvidae       | 359.5        | 61.75         |                         | 15         |
| Blue jay             | <i>Cyanocitta cristata</i>        | Passeriformes   | Corvidae       | 61           | 33.3          |                         | 3          |

| Species                 |                                | Order         | Family       | Body mass, g | SI length, cm | SI NSA, cm <sup>2</sup> | Source                                      |
|-------------------------|--------------------------------|---------------|--------------|--------------|---------------|-------------------------|---------------------------------------------|
| Common name             | Scientific name                |               |              |              |               |                         |                                             |
| Song sparrow            | <i>Melospiza melodia</i>       | Passeriformes | Fringillidae | 21.2         | 18.4          | 16.87                   | 16                                          |
| Pine grosbeak           | <i>Pinicola enucleator</i>     | Passeriformes | Fringillidae | 52.6         | 100.99        |                         | 14                                          |
| Rufous-sided towhee     | <i>Pipilo erythrophthalmus</i> | Passeriformes | Fringillidae | 41.5         | 19.49         | 18.29                   | 5, 16, 17                                   |
| Scarlet tanager         | <i>Piranga olivacea</i>        | Passeriformes | Fringillidae | 31.4         | 17.9          | 20.52                   | 16                                          |
| Scarlet-rumped tanager  | <i>Ramphocelus passerinii</i>  | Passeriformes | Fringillidae | 30.3         | 14.8          | 16.4                    | 16                                          |
| Variable seedeater      | <i>Sporophila aurita</i>       | Passeriformes | Fringillidae | 10.4         | 11            | 6.11                    | 16                                          |
| Silver-throated tanager | <i>Tangara icterocephala</i>   | Passeriformes | Fringillidae | 22           | 12.3          | 12.47                   | 16                                          |
| Blue-gray tanager       | <i>Thraupis virens</i>         | Passeriformes | Fringillidae | 34           | 11.5          | 12.71                   | 16                                          |
| Red-winged blackbird    | <i>Agelaius phoeniceus</i>     | Passeriformes | Icteridae    | 57.5         |               | 15.5                    | 18                                          |
| Streak-backed oriole    | <i>Icterus pustulatus</i>      | Passeriformes | Icteridae    | 28.2         |               | 7.08                    | C. Martínez del Rio, personal communication |
| Orchard oriole          | <i>Icterus spurius</i>         | Passeriformes | Icteridae    | 18.5         |               | 6.57                    | C. Martínez del Rio, personal communication |
| Brown-headed cowbird    | <i>Molothrus ater</i>          | Passeriformes | Icteridae    | 40.8         |               | 12.9                    | C. Martínez del Rio, personal communication |
| Boat-tailed grackle     | <i>Quiscalus major</i>         | Passeriformes | Icteridae    | 178.2        | 46.2          |                         | 3                                           |
| Great-tailed grackle    | <i>Quiscalus mexicanus</i>     | Passeriformes | Icteridae    | 95.9         |               | 30.4                    | C. Martínez del Rio, personal communication |
| Common grackle          | <i>Quiscalus quiscula</i>      | Passeriformes | Icteridae    | 81.1         | 32.3          |                         | 3                                           |
| Gray catbird            | <i>Dumetella carolinensis</i>  | Passeriformes | Mimidae      | 32           | 17            | 18.7                    | 19                                          |
| Northern mockingbird    | <i>Mimus polyglottos</i>       | Passeriformes | Mimidae      | 51.9         | 20.4          | 27.74                   | 16                                          |
| British robin           | <i>Erithacus rubecula</i>      | Passeriformes | Muscicapidae | 16.3         | 14.82         |                         | 20, 21                                      |
| North American thrush   | <i>Hylocichla guttata</i>      | Passeriformes | Muscicapidae | 31           | 17.6          | 23.87                   | 16                                          |

| Species                          |                                | Order         | Family                    | Body mass, g | SI length, cm | SI NSA, cm <sup>2</sup> | Source                                      |
|----------------------------------|--------------------------------|---------------|---------------------------|--------------|---------------|-------------------------|---------------------------------------------|
| Common name                      | Scientific name                |               |                           |              |               |                         |                                             |
| Clay-colored robin               | <i>Turdus grayi</i>            | Passeriformes | Muscicapidae/<br>Turdidae | 74.7         | 19.1          | 29.51                   | 16                                          |
| Tufted titmouse                  | <i>Parus bicolor</i>           | Passeriformes | Paridae                   | 21.3         | 17.6          | 19.9                    | 16                                          |
| Carolina chickadee               | <i>Parus carolinensis</i>      | Passeriformes | Paridae                   | 10.1         | 9.1           | 6.43                    | 16                                          |
| Great tit                        | <i>Parus major</i>             | Passeriformes | Paridae                   | 16.2         | 14.2          | 7.11                    | 21, 22                                      |
| Yellow-rumped warbler            | <i>Dendroica coronata</i>      | Passeriformes | Parulidae                 | 11.9         | 12.37         | 5.83                    | 23, 24                                      |
| Pine warbler                     | <i>Dendroica pinus</i>         | Passeriformes | Parulidae                 | 11.7         | 13.7          | 6                       | 25                                          |
| Orange-crowned warbler           | <i>Vermivora celata</i>        | Passeriformes | Parulidae                 | 8.2          |               | 5.4                     | 26                                          |
| House sparrow                    | <i>Passer domesticus</i>       | Passeriformes | Passeridae                | 26.6         | 17            | 11.8                    | 4, 27                                       |
| Thrush-like manakin              | <i>Schiffornis turdinus</i>    | Passeriformes | Pipridae/<br>Cotingidae   | 32           | 17.8          | 16.26                   | 16                                          |
| Tree sparrow                     | <i>Passer montanus</i>         | Passeriformes | Ploceidae                 | 25           | 16.12         | 5.96                    | 28                                          |
| Goldcrest                        | <i>Regulus regulus</i>         | Passeriformes | Regulidae                 | 5.1          | 6.17          |                         | 20                                          |
| White-breasted nuthatch          | <i>Sitta carolinensis</i>      | Passeriformes | Sittidae                  | 20.9         | 16.2          | 14.65                   | 16                                          |
| European starling                | <i>Sturnus vulgaris</i>        | Passeriformes | Sturnidae                 | 73           | 32.24         | 29.05                   | 5, 14, 18, 19                               |
| Garden warbler                   | <i>Sylvia borin</i>            | Passeriformes | Sylviidae                 | 18.5         | 15            |                         | 21, 29                                      |
| Orange-billed nightingale-thrush | <i>Catharus aurantirostris</i> | Passeriformes | Turdidae                  | 25.2         |               | 9.12                    | C. Martínez del Rio, personal communication |
| Hermit thrush                    | <i>Catharus guttatus</i>       | Passeriformes | Turdidae                  | 33           |               | 11.2                    | 30                                          |
| Gray-cheeked thrush              | <i>Catharus minimus</i>        | Passeriformes | Turdidae                  | 43.5         |               | 14.8                    | 30                                          |
| American robin                   | <i>Turdus migratorius</i>      | Passeriformes | Turdidae                  | 78.4         | 26.97         | 33.79                   | 3, 5, 16, 19                                |
| Fieldfare                        | <i>Turdus pilaris</i>          | Passeriformes | Turdidae                  | 102.7        | 41.08         |                         | 14                                          |
| Rufous-backed robin              | <i>Turdus rufopalliatius</i>   | Passeriformes | Turdidae                  | 70.4         |               | 24.23                   | C. Martínez del Rio, personal communication |
| Yellow-bellied elaenia           | <i>Elaenia flavogaster</i>     | Passeriformes | Tyrannidae                | 23.5         | 12.5          | 14.99                   | 16                                          |

| Species                              |                                                   | Order         | Family          | Body mass, g | SI length, cm | SI NSA, cm <sup>2</sup> | Source                                      |
|--------------------------------------|---------------------------------------------------|---------------|-----------------|--------------|---------------|-------------------------|---------------------------------------------|
| Common name                          | Scientific name                                   |               |                 |              |               |                         |                                             |
| Western flycatcher                   | <i>Empidonax difficilis</i>                       | Passeriformes | Tyrannidae      | 10.9         |               | 4.74                    | C. Martínez del Rio, personal communication |
| Ochre-bellied flycatcher             | <i>Mionectes oleagineus/Pipromorpha oleaginea</i> | Passeriformes | Tyrannidae      | 10.8         | 15.3          | 11.24                   | 16                                          |
| Great kiskadee                       | <i>Pitangus sulphuratus</i>                       | Passeriformes | Tyrannidae      | 73.3         |               | 21.58                   | C. Martínez del Rio, personal communication |
|                                      | <i>Terrenotricus erythrorus</i>                   | Passeriformes | Tyrannidae      | 7.5          | 6.1           | 4.56                    | 16                                          |
| Tropical kingbird                    | <i>Tyrannus melancholicus</i>                     | Passeriformes | Tyrannidae      | 39.8         | 19            |                         | 16                                          |
| Yellow-breasted chat                 | <i>Icteria virens</i>                             | Passeriformes | Vireonidae      | 21.9         |               | 10.82                   | C. Martínez del Rio, personal communication |
| Blue-headed vireo                    | <i>Vireo solitarius</i>                           | Passeriformes | Vireonidae      | 17           | 13.2          | 11.9                    | 16                                          |
| Lesser honeyguide                    | <i>Indicator minor</i>                            | Piciformes    | Indicatoridae   | 24.7         | 24.6          |                         | 31                                          |
| <b>TERRESTRIAL EUTHERIAN MAMMALS</b> |                                                   |               |                 |              |               |                         |                                             |
| Pig                                  | <i>Sus scrofa</i>                                 | Artiodactyla  | Suidae          | 111,850      |               | 10,047                  | 32, 33                                      |
| Dog                                  | <i>Canis familiaris</i>                           | Carnivora     | Canidae         | 9,782.5      | 271           | 907                     | 32-37                                       |
| Red fox                              | <i>Vulpes vulpes</i>                              | Carnivora     | Canidae         | 6,320        | 210           | 939.2                   | 32, 34                                      |
| Leopard                              | <i>Panthera pardus</i>                            | Carnivora     | Felidae         | 15,700       |               | 1,580                   | 32                                          |
| African golden cat                   | <i>Profelis aurata</i>                            | Carnivora     | Felidae         | 5,230        |               | 404                     | 32                                          |
| African palm civet                   | <i>Nandinia binotata</i>                          | Carnivora     | Nandiniidae     | 2,363.3      |               | 370                     | 32                                          |
| Servaline genet                      | <i>Genetta servalina</i>                          | Carnivora     | Viverridae      | 1,480        |               | 274                     | 32                                          |
| African linsang                      | <i>Poiana richardsoni</i>                         | Carnivora     | Viverridae      | 510          |               | 184                     | 32                                          |
| South American squirrel monkey       | <i>Saimiri sciureus</i>                           | Primates      | Cebidae         | 675.4        | 114.88        |                         | 38                                          |
| Grey-cheeked mangabey                | <i>Cercocebus albigena</i>                        | Primates      | Cercopithecidae | 3,700        |               | 453                     | 32                                          |

| Species                         |                                | Order    | Family          | Body mass, g  | SI length, cm | SI NSA, cm <sup>2</sup> | Source             |
|---------------------------------|--------------------------------|----------|-----------------|---------------|---------------|-------------------------|--------------------|
| Common name                     | Scientific name                |          |                 |               |               |                         |                    |
| Vervet monkey                   | <i>Cercopithecus aethiops</i>  | Primates | Cercopithecidae | 4,700         |               | 643.5                   | 39                 |
| Western black-and-white colobus | <i>Colobus polykomos</i>       | Primates | Cercopithecidae | 6,500         |               | 925                     | 32                 |
| Long-tailed macaque             | <i>Macaca fascicularis</i>     | Primates | Cercopithecidae | 3,216.7       |               | 1,024.3                 | 32                 |
| Rhesus macaque                  | <i>Macaca mulatta</i>          | Primates | Cercopithecidae | 13,885        |               | 768.67                  | 32, 40             |
| Talapoín monkey                 | <i>Miopithecus talapoín</i>    | Primates | Cercopithecidae | 915           |               | 522.5                   | 32                 |
| Mandrill                        | <i>Papio sphinx</i>            | Primates | Cercopithecidae | 14,450        |               | 2,644.5                 | 32                 |
| Greater dwarf lemur             | <i>Cheirogaleus major</i>      | Primates | Cheirogaleidae  | 230           |               | 42                      | 32                 |
| Fork-crowned lemur              | <i>Phaner furcifer</i>         | Primates | Cheirogaleidae  | 270           |               | 95                      | 32                 |
| Demidoff's dwarf bushbaby       | <i>Galago demidovii</i>        | Primates | Galagonidae     | 60            |               | 36                      | 32                 |
| Human                           | <i>Homo sapiens</i>            | Primates | Hominidae       | 70,000-78,300 | 600           | 5897.5                  | 33, 34, 41, 42     |
| Calabar potto                   | <i>Arctocebus calabarensis</i> | Primates | Loridae         | 176.7         |               | 103                     | 32                 |
| Potto                           | <i>Perodicticus potto</i>      | Primates | Loridae         | 1,160         |               | 200                     | 32                 |
| Northern jumping mouse          | <i>Zapus hudsonius</i>         | Rodentia | Dipodidae       | 20            |               | 23                      | 43                 |
| Spiny mouse                     | <i>Acomys spinosissimus</i>    | Rodentia | Muridae         | 17.2          | 25.99         | 20.53                   | 44                 |
| Cape short-eared gerbil         | <i>Desmodillus auricularis</i> | Rodentia | Muridae         | 86.2          | 37.51         |                         | 44                 |
| Griselda's striped grass mouse  | <i>Lemniscomys griselda</i>    | Rodentia | Muridae         | 54.9          | 24.38         | 29.99                   | 44                 |
| Gerbil                          | <i>Meriones unguiculatus</i>   | Rodentia | Muridae         | 70.1          | 30.5          | 34.3                    | 33, 36             |
| Syrian hamster                  | <i>Mesocricetus auratus</i>    | Rodentia | Muridae         | 122.6         | 41            | 56.7                    | 33, 35, 36, 46, 47 |
| Harvest mouse                   | <i>Micromys minutus</i>        | Rodentia | Muridae         | 8.9           |               | 14.2                    | 33                 |
| Pygmy mouse                     | <i>Mus minutoides</i>          | Rodentia | Muridae         | 4.7           | 17.45         | 13.96                   | 44                 |

| Species                                |                                | Order      | Family         | Body mass, g | SI length, cm | SI NSA, cm <sup>2</sup> | Source                                                           |
|----------------------------------------|--------------------------------|------------|----------------|--------------|---------------|-------------------------|------------------------------------------------------------------|
| Common name                            | Scientific name                |            |                |              |               |                         |                                                                  |
| Mouse                                  | <i>Mus musculus</i>            | Rodentia   | Muridae        | 38.2         | 45            | 43                      | 33, 34, 48; R. Ferraris and J.M. Diamond, personal communication |
| Long-tailed deer mouse                 | <i>Peromyscus leucopus</i>     | Rodentia   | Muridae        | 25           |               | 39                      | 43                                                               |
| Woodland deer mouse                    | <i>Peromyscus maniculatus</i>  | Rodentia   | Muridae        | 20           |               | 24                      | 43                                                               |
| Laboratory rat                         | <i>Rattus norvegicus</i>       | Rodentia   | Muridae        | 305          | 95.1          | 119.2                   | 4, 33-35, 49-53                                                  |
| House rat                              | <i>Rattus rattus</i>           | Rodentia   | Muridae        | 105.2        | 95.64         |                         | 44                                                               |
| Four-striped grass mouse               | <i>Rhabdomys pumilio</i>       | Rodentia   | Muridae        | 46.2         | 29.35         | 32.29                   | 44                                                               |
| Acacia rat                             | <i>Thallomys paedulcus</i>     | Rodentia   | Muridae        | 55.2         | 31.3          | 36                      | 44                                                               |
| Nutria                                 | <i>Myocastor coypus</i>        | Rodentia   | Myocastoridae  | 5,358.4      |               | 1,040.1                 | 33, 36, 54                                                       |
| Woodland dormouse                      | <i>Graphiurus murinus</i>      | Rodentia   | Myoxidae       | 20.9         | 17.01         | 17.01                   | 44                                                               |
| Pouched mouse                          | <i>Saccostomus campestris</i>  | Rodentia   | Nesomyidae     | 82.9         | 38.93         | 51.78                   | 44                                                               |
| Fat mouse                              | <i>Steatomys pratensis</i>     | Rodentia   | Nesomyidae     | 31.5         | 25.69         | 23.12                   | 44                                                               |
| Ebrien squirrel                        | <i>Epixerus ebii</i>           | Rodentia   | Sciuridae      | 560          | 174           | 208.5                   | 32                                                               |
| Red squirrel                           | <i>Sciurus vulgaris</i>        | Rodentia   | Sciuridae      | 600          | 80            | 306.5                   | 32, 34                                                           |
| Belding's ground squirrel              | <i>Spermophilus beldingi</i>   | Rodentia   | Sciuridae      | 318          |               |                         | W.H.K., unpublished data                                         |
| <b>FLYING EUTHERIAN MAMMALS (BATS)</b> |                                |            |                |              |               |                         |                                                                  |
| Mariana sheath-tailed bat              | <i>Emballonura semicaudata</i> | Chiroptera | Emballonuridae | 7            | 9             |                         | 55                                                               |
| Proboscis bat                          | <i>Rhynchonycteris naso</i>    | Chiroptera | Emballonuridae | 4            | 12            |                         | 55                                                               |
| Black-bearded tomb bat                 | <i>Taphozous melanopogon</i>   | Chiroptera | Emballonuridae | 22.7         | 53.6          |                         | 55                                                               |
| Yellow-winged bat                      | <i>Lavia frons</i>             | Chiroptera | Megadermatidae | 23.4         | 16.1          |                         | 55                                                               |

| Species                     |                                | Order      | Family         | Body mass, g | SI length, cm | SI NSA, cm <sup>2</sup> | Source         |
|-----------------------------|--------------------------------|------------|----------------|--------------|---------------|-------------------------|----------------|
| Common name                 | Scientific name                |            |                |              |               |                         |                |
| Greater false vampire bat   | <i>Megaderma lyra</i>          | Chiroptera | Megadermatidae | 35.3         | 15.7          |                         | 55             |
| Lesser false vampire bat    | <i>Megaderma spasma</i>        | Chiroptera | Megadermatidae | 23.8         | 11.5          |                         | 55             |
| Hairless bat                | <i>Cheiromeles torquatus</i>   | Chiroptera | Molossidae     | 168.5        | 34            |                         | 55             |
| Pallas's mastiff bat        | <i>Molossus major</i>          | Chiroptera | Molossidae     | 10.7         | 12.3          |                         | 56             |
| Egyptian free-tailed bat    | <i>Tadarida aegyptiaca</i>     | Chiroptera | Molossidae     | 17.7         | 16.6          |                         | 55             |
| Brazilian free-tailed bat   | <i>Tadarida brasiliensis</i>   | Chiroptera | Molossidae     | 11.2         | 15.95         |                         | 57             |
| Ghost-faced bat             | <i>Mormoops megalophylla</i>   | Chiroptera | Mormoopidae    | 15.3         |               | 7.15                    | 58             |
| Parnell's moustached bat    | <i>Pteronotus parnellii</i>    | Chiroptera | Mormoopidae    | 20.1         | 14.7          | 7.04                    | 57, 58         |
| Greater bulldog bat         | <i>Noctilio leporinus</i>      | Chiroptera | Noctilionidae  | 59.2         | 34.2          |                         | 57             |
| Large slit-faced bat        | <i>Nycteris grandis</i>        | Chiroptera | Nycteridae     | 29.4         | 24.3          |                         | 55             |
| Egyptian slit-faced bat     | <i>Nycteris thebaica</i>       | Chiroptera | Nycteridae     | 8.95         | 11.7          |                         | 55             |
| Geoffrey's hairy-legged bat | <i>Anoura geoffroyi</i>        | Chiroptera | Phyllostomidae | 15.5         |               | 7.37                    | 58             |
| Fringed fruit-eating bat    | <i>Artibeus fimbriatus</i>     | Chiroptera | Phyllostomidae | 63.9         | 34.68         |                         | 57             |
| Jamaican fruit-eating bat   | <i>Artibeus jamaicensis</i>    | Chiroptera | Phyllostomidae | 39.3         | 31.3          |                         | 55             |
| Great fruit-eating bat      | <i>Artibeus lituratus</i>      | Chiroptera | Phyllostomidae | 69.6         | 42.18         | 28.7                    | 57, This study |
| Antillean fruit-eating bat  | <i>Brachyphylla cavernarum</i> | Chiroptera | Phyllostomidae | 46.8         | 30.3          |                         | 55             |
| Silky short-tailed bat      | <i>Carollia brevicauda</i>     | Chiroptera | Phyllostomidae | 17.2         |               | 7.5                     | 58             |
| Short-tailed bat            | <i>Carollia perspicillata</i>  | Chiroptera | Phyllostomidae | 16.1         | 20.85         |                         | 56, 57         |
| Wrinkle-faced bat           | <i>Centurio senex</i>          | Chiroptera | Phyllostomidae | 26           |               | 15.01                   | 58             |

| Species                      |                               | Order      | Family         | Body mass, g | SI length, cm | SI NSA, cm <sup>2</sup> | Source |
|------------------------------|-------------------------------|------------|----------------|--------------|---------------|-------------------------|--------|
| Common name                  | Scientific name               |            |                |              |               |                         |        |
| Salvin's big-eyed bat        | <i>Chiroderma salvini</i>     | Chiroptera | Phyllostomidae | 25           |               | 11.77                   | 58     |
| Hairy big-eyed bat           | <i>Chiroderma villosum</i>    | Chiroptera | Phyllostomidae | 24.8         | 37            |                         | 55     |
| Godman's long-tailed bat     | <i>Choeroniscus godmani</i>   | Chiroptera | Phyllostomidae | 10.1         |               | 3.89                    | 58     |
| Big-eared woolly bat         | <i>Chrotopterus auritus</i>   | Chiroptera | Phyllostomidae | 96.1         | 32            |                         | 57     |
| Toltec fruit-eating bat      | <i>Dermanura tolteca</i>      | Chiroptera | Phyllostomidae | 15.2         |               | 7.76                    | 58     |
| Vampire bat                  | <i>Desmodus rotundus</i>      | Chiroptera | Phyllostomidae | 29           | 26.95         | 14.02                   | 57, 58 |
| Hairy-legged vampire bat     | <i>Diphylla ecaudata</i>      | Chiroptera | Phyllostomidae | 27.8         | 20.5          |                         | 57     |
| Pallas's long-tongued bat    | <i>Glossophaga soricina</i>   | Chiroptera | Phyllostomidae | 10.2         | 11.75         |                         | 57     |
| Lesser long-nosed bat        | <i>Leptonycteris curasoae</i> | Chiroptera | Phyllostomidae | 24.8         | 18            | 8.48                    | 57, 58 |
| Waterhouse's leaf-nosed bat  | <i>Macrotus waterhousii</i>   | Chiroptera | Phyllostomidae | 18.9         |               | 7.59                    | 58     |
| Pale spear-nosed bat         | <i>Phyllostomus discolor</i>  | Chiroptera | Phyllostomidae | 41.5         |               | 14.9                    | 58     |
| Greater spear-nosed bat      | <i>Phyllostomus hastatus</i>  | Chiroptera | Phyllostomidae | 87.1         | 38            |                         | 57     |
| White-lined broad-nosed bat  | <i>Platyrrhinus lineatus</i>  | Chiroptera | Phyllostomidae | 21.9         | 30.33         |                         | 57     |
| Greater broad-nosed bat      | <i>Platyrrhinus vittatus</i>  | Chiroptera | Phyllostomidae | 36.6         | 36.2          |                         | 55     |
| Little yellow shouldered bat | <i>Sturnira lilium</i>        | Chiroptera | Phyllostomidae | 16.8 - 21.9  | 21.8          | 9.58                    | 57, 58 |
| Pygmy round-eared bat        | <i>Toniata brasiliensis</i>   | Chiroptera | Phyllostomidae | 11.8         |               | 5.62                    | 58     |
| Fringe-lipped bat            | <i>Trachops cirrhosus</i>     | Chiroptera | Phyllostomidae | 33.5         |               | 11.29                   | 58     |
| Little yellow-eared bat      | <i>Vampyressa pusilla</i>     | Chiroptera | Phyllostomidae | 8.8          | 17.9          |                         | 57     |
| Great stripe-faced bat       | <i>Vampyroides caraccioli</i> | Chiroptera | Phyllostomidae | 31           |               | 15.64                   | 58     |



| Species                         |  | Scientific name                  | Order      | Family           | Body mass, g | SI length, cm | SI NSA, cm <sup>2</sup> | Source         |
|---------------------------------|--|----------------------------------|------------|------------------|--------------|---------------|-------------------------|----------------|
| Common name                     |  |                                  |            |                  |              |               |                         |                |
| Straw-colored fruit bat         |  | <i>Eidolon helvum</i>            | Chiroptera | Pteropodidae     | 266.8        | 170           |                         | 55             |
| Lesser dawn bat                 |  | <i>Eonycteris spelaea</i>        | Chiroptera | Pteropodidae     | 51.6         | 35            |                         | 57             |
| Wahlberg's epauletted fruit bat |  | <i>Epomophorus wahlbergi</i>     | Chiroptera | Pteropodidae     | 76           | 73.3          | 76.49                   | 59             |
| Franquet's epauletted bat       |  | <i>Epomops franqueti</i>         | Chiroptera | Pteropodidae     | 118.3        | 80            |                         | 55             |
| Hammer-headed fruit bat         |  | <i>Hypsignathus monstrosus</i>   | Chiroptera | Pteropodidae     | 324.6        | 115           |                         | 55             |
| Angola fruit bat                |  | <i>Lisonycteris angolensis</i>   | Chiroptera | Pteropodidae     | 76.9         | 72.2          | 45.05                   | 59             |
| Black flying fox                |  | <i>Pteropus alecto</i>           | Chiroptera | Pteropodidae     | 540          | 163           |                         | 60             |
| Gray-headed flying fox          |  | <i>Pteropus poliocephalus</i>    | Chiroptera | Pteropodidae     | 630 - 645    | 169           | 215                     | 57, 60, 61     |
| Egyptian fruit bat              |  | <i>Rousettus aegyptiacus</i>     | Chiroptera | Pteropodidae     | 126 - 168.3  | 103.45        | 33.3                    | 57, This study |
| Southern blossom bat            |  | <i>Syconycteris australis</i>    | Chiroptera | Pteropodidae     | 18.8         | 36.1          |                         | 62             |
| Trident leaf-nosed bat          |  | <i>Asellia tridens</i>           | Chiroptera | Rhinolophidae    | 12.8         | 11.7          |                         | 55             |
| Diadem roundleaf bat            |  | <i>Hipposideros diadema</i>      | Chiroptera | Rhinolophidae    | 43.6         | 24            |                         | 55             |
| Geoffroy's horseshoe bat        |  | <i>Rhinolophus clivosus</i>      | Chiroptera | Rhinolophidae    | 20.1         | 10.2          |                         | 55             |
| Greater horseshoe bat           |  | <i>Rhinolophus ferrumequinum</i> | Chiroptera | Rhinolophidae    | 23.5         | 17.9          |                         | 57             |
| Lesser horseshoe bat            |  | <i>Rhinolophus hipposideros</i>  | Chiroptera | Rhinolophidae    | 4.6          | 8.05          |                         | 55             |
| Lesser mouse-tailed bat         |  | <i>Rhinopoma hardwicki</i>       | Chiroptera | Rhinopomatidae   | 12.9         | 5.27          |                         | 55             |
| Greater mouse-tailed bat        |  | <i>Rhinopoma microphyllum</i>    | Chiroptera | Rhinopomatidae   | 27.1         | 7.73          |                         | 55             |
| Big brown bat                   |  | <i>Eptesicus fuscus</i>          | Chiroptera | Vespertilionidae | 18           |               | 16                      | 43             |
| Serotine                        |  | <i>Eptesicus serotinus</i>       | Chiroptera | Vespertilionidae | 27           | 16.1          |                         | 57             |
| Eastern red bat                 |  | <i>Lasiurus borealis</i>         | Chiroptera | Vespertilionidae | 12.2         | 8             |                         | 57             |

| Species                        |  | Scientific name                  | Order      | Family           | Body mass, g | SI length, cm | SI NSA, cm <sup>2</sup> | Source |
|--------------------------------|--|----------------------------------|------------|------------------|--------------|---------------|-------------------------|--------|
| Common name                    |  |                                  |            |                  |              |               |                         |        |
| Greater long-fingered bat      |  | <i>Miniopterus inflatus</i>      | Chiroptera | Vespertilionidae | 8.9          | 19.6          | 9.13                    | 59     |
| Schreibers's long-fingered bat |  | <i>Miniopterus schreibersi</i>   | Chiroptera | Vespertilionidae | 10.9         | 15.97         |                         | 57     |
| Daubenton's bat                |  | <i>Myotis daubentoni</i>         | Chiroptera | Vespertilionidae | 7.8          | 17.6          |                         | 55     |
| Mouse-eared bat                |  | <i>Myotis myotis</i>             | Chiroptera | Vespertilionidae | 25           | 17.55         |                         | 57     |
| Whiskered bat                  |  | <i>Myotis mystacinus</i>         | Chiroptera | Vespertilionidae | 4.85         | 13            |                         | 55     |
| Natterer's bat                 |  | <i>Myotis nattereri</i>          | Chiroptera | Vespertilionidae | 7.15         | 14.8          |                         | 55     |
| Noctule bat                    |  | <i>Nyctalus noctula</i>          | Chiroptera | Vespertilionidae | 26           | 17.05         |                         | 55     |
| Kuhl's pipistrelle             |  | <i>Pipistrellus kuhlii</i>       | Chiroptera | Vespertilionidae | 6.3          | 9.3           |                         | 55     |
| Common pipistrelle             |  | <i>Pipistrellus pipistrellus</i> | Chiroptera | Vespertilionidae | 6.6          | 9.6           |                         | 57     |
| Brown big-eared bat            |  | <i>Plecotus auritus</i>          | Chiroptera | Vespertilionidae | 11.4         | 12            |                         | 57     |
| Lesser Asiatic yellow bat      |  | <i>Scotophilus kuhlii</i>        | Chiroptera | Vespertilionidae | 19.6         | 20            |                         | 55     |
| Parti-colored bat              |  | <i>Vespertilio murinus</i>       | Chiroptera | Vespertilionidae | 33.3         | 25.5          |                         | 55     |

- Wilson DE, Reeder DM (1993) *Mammal Species of the World: A Taxonomic and Geographic Reference* (Smithsonian Institution, Washington, DC), 2nd Ed.
- Moorman TE, Baldassarre GA, Richard DM (1992) *Condor* 94: 401-417.
- DeGoliere TF, Mahoney SA, Duke GE (1999) *Condor* 101: 622-634.
- Lavin SR (2007) PhD thesis (University of Wisconsin, Madison).
- Karasov WH (1990) *Stud Avian Biol* 13: 391-415.
- Barnes GG, Thomas VG (1987) *Can J Zool* 65: 1812-1817.
- Kehoe FP, Ankney CD (1985) *Can J Zool* 63: 2339-2342.
- Verzar F, McDougall EJ (1936) *Absorption From the Intestine* (Longmans and Green, London).
- Obst BS, Diamond JM (1989) *J Exp Zool Suppl* 3: 117-126.
- Karasov WH, Afik D, Darken BW (1996) *Comp Biochem Physiol* 113A: 233-238.
- Leopold AS (1953) *J Wildl Manag* 2: 197-203.
- Christaki E, Babis V, Florou-Paneri P, Kufidis D, Spais AB (1997) *Anim Feed Sci Tech* 65: 287-292.
- Starck JM, Rahmaan GHA (2003) *J Exp Biol* 206: 1887-1897.

14. Pulliainen E, Helle E, Tunkkari P (1981) *Orn Fenn* 58: 21-28.
15. Przystalski A (1985) *Zool Polon* 32: 14-21.
16. Ricklefs RE (1996) *Condor* 98: 279-292.
17. Davis J (1961) *Condor* 63: 313-321.
18. Martínez del Río C, Brugger KE, Rios JL, Vergara ME, Witmer M (1995) *Physiol Zool* 68: 490-511.
19. Karasov WH, Levey DJ (1990) *Physiol Zool* 63: 1248-1270.
20. Przystalski A (1984) *Act Biol Cracov* 26: 89-99.
21. Herrera CM (1984) *Ecology* 65: 609-617.
22. Przystalski A (1986) *Zool Polon* 35: 5-20.
23. Afik D, Karasov WH (1995) *Ecology* 76: 2247-2257.
24. Afik D, Darken BW, Karasov WH (1997) *Physiol Zool* 70: 213-221.
25. Levey DJ, Place AR, Rey PJ, Martínez del Río C (1999) *Physiol Biochem Zool* 72: 576-587.
26. Schondube JE, Martínez del Río C (2004) *J Comp Physiol B* 174: 263-273.
27. Caviedes-Vidal E, Afik D, Martínez del Río C, Karasov WH (2000) *Comp Biochem Physiol A-Mol Integr Physiol* 125: 11-24.
28. Przystalski A (1987) *Act Biol Cracov* 29: 93-104.
29. Hume ID, Biebach H (1996) *J Comp Physiol B* 166: 388-395.
30. Witmer MC, Martínez del Río C (2001) *Physiol Biochem Zool* 74: 584-593.
31. Downs CT, van Dyk RJ, Iji P (2002) *Comp Biochem Physiol A* 133: 125-134.
32. Chivers DJ, Hladik CM (1980) *J Morph* 166: 337-386.
33. Snipes RL (1997) *Adv Anat Embry Cell Biol* 138: 1-88.
34. Pappenheimer JR (1998) *Comp Biochem Physiol* 121A: 45-58.
35. Anderson JH, Taylor AB (1973) *J Morph* 141: 281-291.
36. Snipes RL, Kriete A (1991) *Zeitschrift für Säugetierkunde* 56: 225-244.
37. Fahey GC, Merchen NR Jr, Corbin AK, Hamilton AK, Serbe KA, Hirakawa DA (1990) *J Anim Sci* 68: 4229-4235.
38. Fooden J (1964) *Am J Phys Anthropol* 22: 227-231.
39. Bruerton MR, Perrin MR (1991) *Zeitschrift für Säugetierkunde* 56: 65-71.
40. Young Owl M (1982) *Allometry in Primate Digestive Systems* (University of California, Los Angeles).
41. Marsh MN, Swift JA (1968) *Gut* 9: 727-728.
42. Wilson TH (1962) *Intestinal Absorption* (Saunders, Philadelphia).
43. Barry RE Jr (1976) *J Mammal* 57: 273-289.
44. Perrin MR, Curtis BA (1980) *S Afr J Zool* 15: 22-33.
45. Knight MH, Knight-Eloff AK (1987) *J Zool* 213: 7-22.
46. Karasov WH, Solberg DH, Diamond JM (1985) *Am J Physiol* 249: G271-G283.
47. Sakaguchi E, Itoh H, Uchida S, Horigome T (1987) *Br J Nutr* 58: 149-158.
48. Diamond JM, Karasov WH (1984) *J Physiol* 349: 419-440.
49. Wood HO (1944) *J Anat* 78: 103-105.

50. Palay SL, Karlin LJ (1959) *J Biophys Biochem Cytol* 5: 373-383.
51. Keegan DJ, Mödinger R (1979) *S Afr J Zool* 14: 220-223.
52. Mayhew TM, Middleton C (1985) *J Anat* 141: 1-17.
53. Clemens ET, Stevens CE (1980) *J Agric Sci* 94: 735-737.
54. Sakaguchi E, Nabata A (1982) *Comp Biochem Physiol A* 103: 601-604.
55. Jones KE, MacLarnon AM (2004) *Am Nat* 164: E20-E31.
56. Klite PD (1965) *J Bacteriol* 90: 375-379.
57. Cruz-Neto AP, Jones KE (2006) in *Functional and Evolutionary Ecology of Bats*, eds Zubaid A, McCracken G, Kunz TH (Oxford University Press, Oxford), pp 59-78.
58. Schondube JE, Herrera-M. LG, Martínez del Rio C (2001) *Zool-Anal Compl Syst* 104: 59-73.
59. Makanya AN, Maina JN, Mayhew TM, Tschanz SA, Burri PH (1997) *J Exp Biol* 200: 2415-2423.
60. Tedman RA, Hall LS (1985) *Aust J Zool* 33: 625-640.
61. Tedman RA, Hall LS (1985) *Aust Mammal* 8: 271-278.
62. Law BS (1992) *Funct Ecol* 6: 257-264.
